# Supplementary material for: Multimaterial Microfluidic 3D Printing of Textured Composites with Liquid Inclusions
Source: PubMed Central journal article supplement (PMC6364488; doi:10.1002/advs.201800730), 2018-11-28
Supplement: ADVS-6-1800730-s002.pdf [file ADVS-6-1800730-s002.pdf]

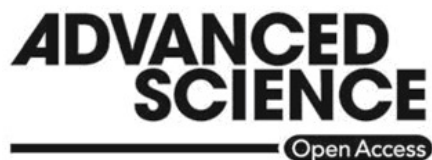

## Supporting Information

for *Adv. Sci.*, DOI: 10.1002/advs.201800730

### Multimaterial Microfluidic 3D Printing of Textured Composites with Liquid Inclusions

*Xiying Li, Jia Ming Zhang,\* Xin Yi,\* Zhongyi Huang, Pengyu Lv, and Huiling Duan*

## Supporting Information

**Multimaterial microfluidic 3D printing of textured composites with liquid inclusions**

Xiying Li, Jia Ming Zhang\*, Xin Yi\*, Zhongyi Huang, Pengyu Lv and Huiling Duan

Emails: zhangjmedu@163.com; xyi@pku.edu.cn

**Contents**

Thermal deflection of the printed two-layer beam.

**Figure S1** T-junction droplet generator.**Figure S2** Rheological properties of the resin outer phase.**Figure S3** The relationship between the normalized droplet diameter  $D_{\text{drop}}/w_0$  and the outer phase capillary number  $Ca_0$  at the T-junction in the generator of mixing droplets.**Figure S4** Structures of the printed line.**Figure S5** Inclusion positioning induced by the density difference between the inclusions and the fluidic matrix (resin here).**Figure S6** The effective Young's modulus  $E_e$  and thermal expansion coefficient  $\alpha_e$ .**Figure S7** Thermal deflection of the two-layer beam in a temperature rise.**Video S1** Printing a spiral structure.**Video S2** Printing the letters PKU (abbreviation of Peking University).**Video S3** Producing on-demand mixing droplets.

For the two-layer beam upon thermal deflection in Figure 4 in the main text, the top layer is composed of pure resin and the composite bottom layer consists of liquid inclusions suspended in the resin matrix as illustrated in Figure S7. Each layer has a thickness of  $H$ . The thermal expansion coefficient of the bottom layer is larger than that of the top layer as shown in Figure 4b. The initial straight beam has a length  $L_0$  at the room temperature  $T_0$ . An increase in temperature to  $T_1$  induces a relative length increase  $\Delta L_m = L_0 \int_{T_0}^{T_1} \alpha_m dT$  in the bottom and a

relative length increase  $\Delta L_e = L_0 \int_{T_0}^{T_1} \alpha_e dT$  in the top layer, and the beam deforms into a

circular arc of an arc angle  $\theta$  and a radius of curvature  $R$ . Here  $\alpha_m$  and  $\alpha_e$  are the thermal expansion coefficients of the resin top layer and the composite bottom layer, respectively. Based on the beam theory on the thermal deflection of a bi-metal strip thermostat,<sup>[37]</sup> the normalized relative length increase of the interface between the top and bottom layers can be

given as  $\varepsilon_{it} = \int_{T_0}^{T_1} \alpha_m dT + \frac{H}{12R} \frac{E_m + E_e}{E_m} + \frac{H}{2R}$  or  $\varepsilon_{ib} = \int_{T_0}^{T_1} \alpha_m dT - \frac{H}{12R} \frac{E_m + E_e}{E_e} - \frac{H}{2R}$ . Then we

have  $\varepsilon_{it} = \varepsilon_{ib}$  or

$$\frac{R}{H} = \frac{14 + \frac{E_m}{E_e} + \frac{E_e}{E_m}}{12 \int_{T_0}^{T_1} (\alpha_e - \alpha_m) dT}.$$

Based on the experimental data on  $E_m$  and  $E_e$  in Figure 4a and  $\alpha_m$  and  $\alpha_e$  in Figure 4b,  $R/H$  is then estimated as 500. As  $H=150 \mu\text{m}$ , we have  $R=7.5 \text{ cm}$  which agrees well with the experimental result in Figure 4c. The thickness variation of each layer during the thermal deformation has been ignored.

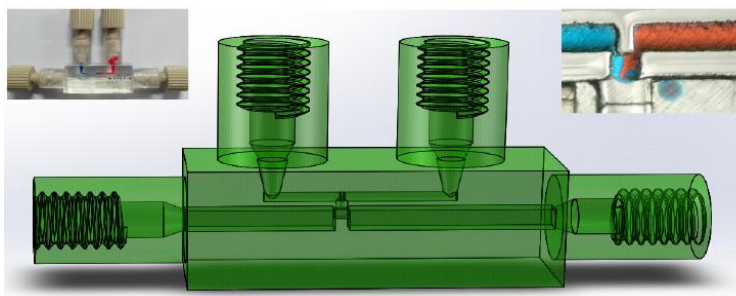

**Figure S1.** T-junction droplet generator. The upper left inset shows the assembled chip in the printing platform and the upper right inset indicates the on-demand mixing droplet formation.

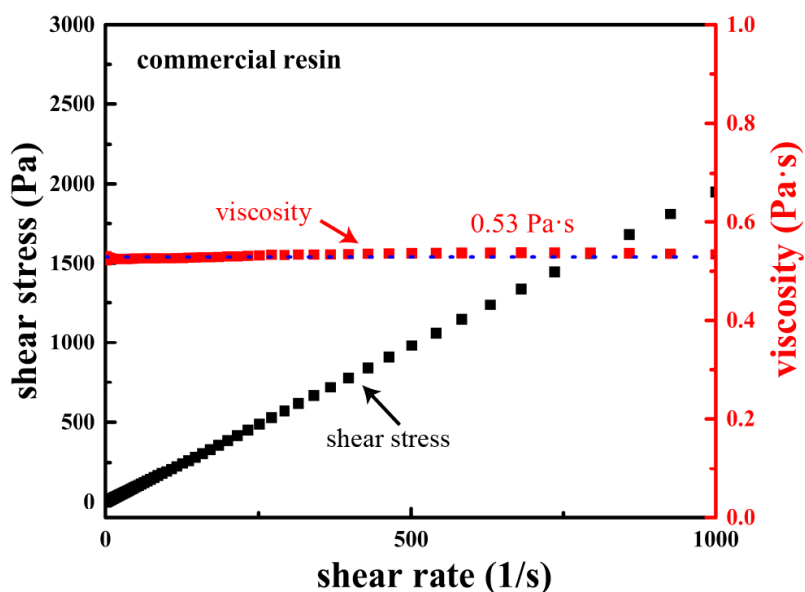

**Figure S2.** Rheological properties of the resin outer phase.

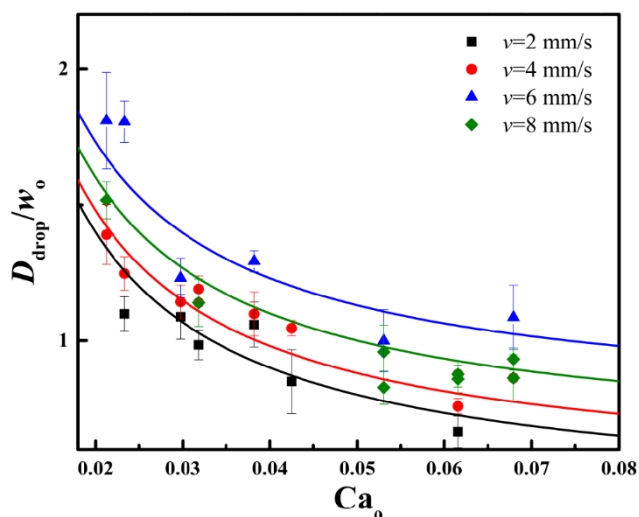

**Figure S3.** The relationship between the normalized droplet diameter  $D_{\text{drop}}/w_o$  and the outer phase capillary number  $Ca_o$  at the T-junction in the generator of mixing droplets. Symbols represent the experimental data and solid lines show the scaling law  $D_{\text{drop}}/w_o \sim Ca_o^{-1}$ .

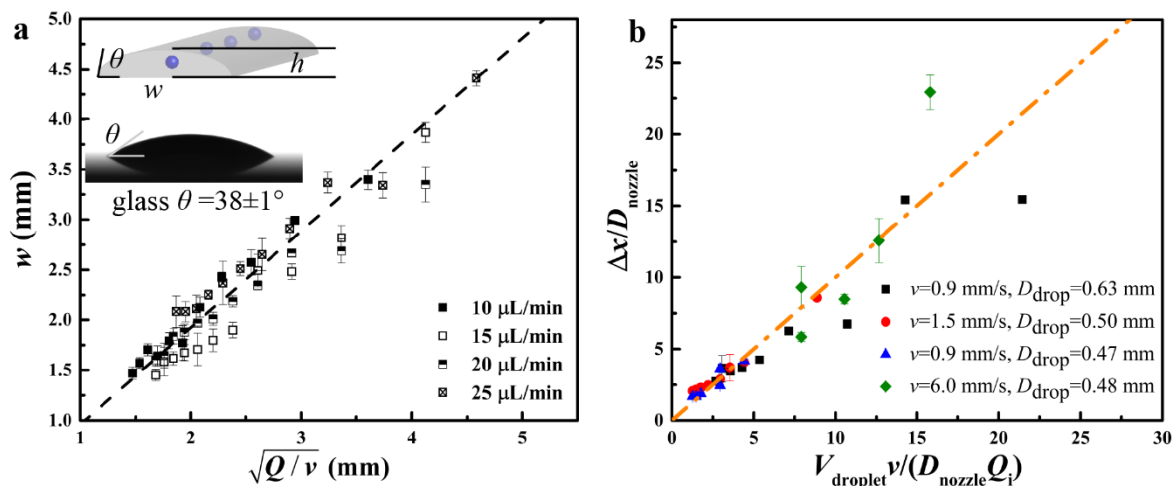

**Figure S4.** Structures of the printed line. (a) The line width  $w$  as a function of  $\sqrt{Q/v}$  with  $Q$  as the total flow rate and  $v$  as the printing speed. Upper inset: schematic of a printed line of width  $w$ , height  $h$ , and contact angle  $\theta$ . Lower inset: contact angle of the resin on the glass substrate at room temperature. (b) The linear relationship between the normalized droplet spacing  $\Delta x/D_{\text{nozzle}}$  and the dimensionless parameter  $V_{\text{droplet}} v / (D_{\text{nozzle}} Q_i)$  with  $V_{\text{droplet}} = \pi D_{\text{drop}}^3 / 6$ . Dots in (a) and (b) are the experimental results and dashed lines represent the theoretical prediction.

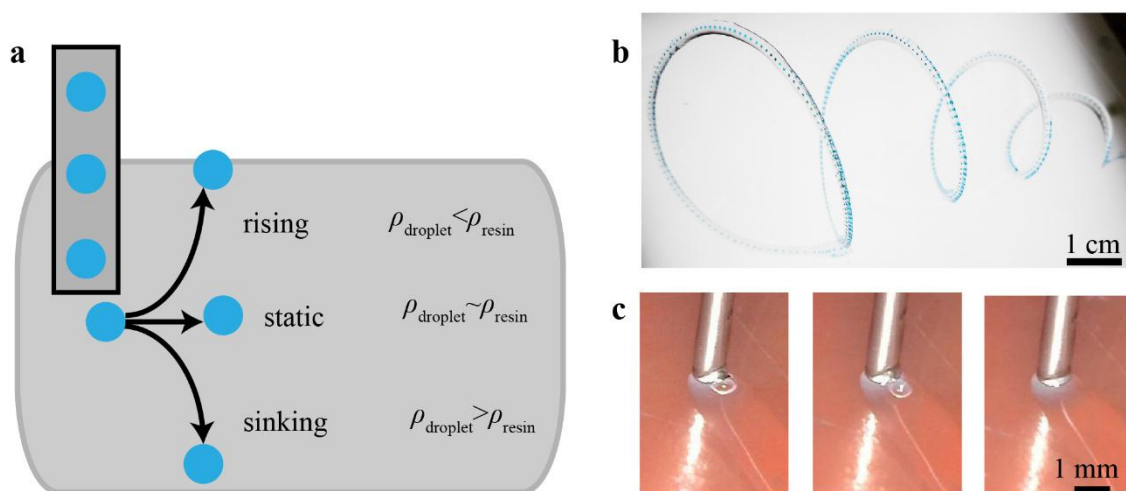

**Figure S5.** Inclusion positioning induced by the density difference between the inclusions and the fluidic matrix (resin here). (a) Illustration of the positioning of the droplet inclusions. (b) Droplets are stable and remain intact in a helical structure formed by pulling the 1D spiral line in Figure 3a in the main text. (c) In the case of the bubble inclusions, the bubbles of a much smaller density than the matrix first rise and then break at the resin surface.

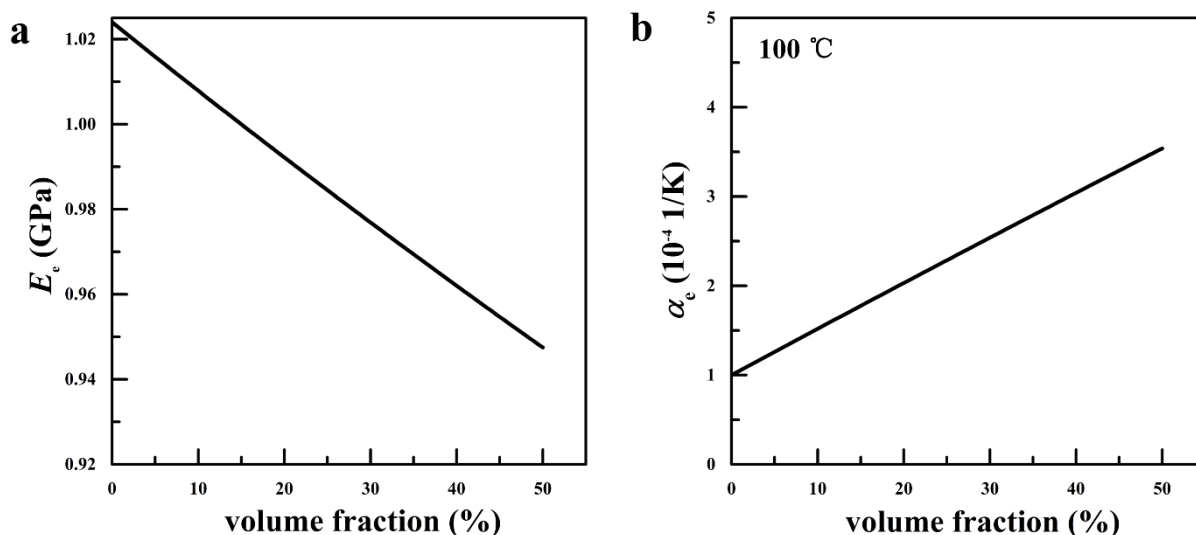

**Figure S6.** The effective Young's modulus  $E_e$  (a) and thermal expansion coefficient  $\alpha_e$  at 100 °C (b) of the two-layer beam as functions of the droplet volume fraction.

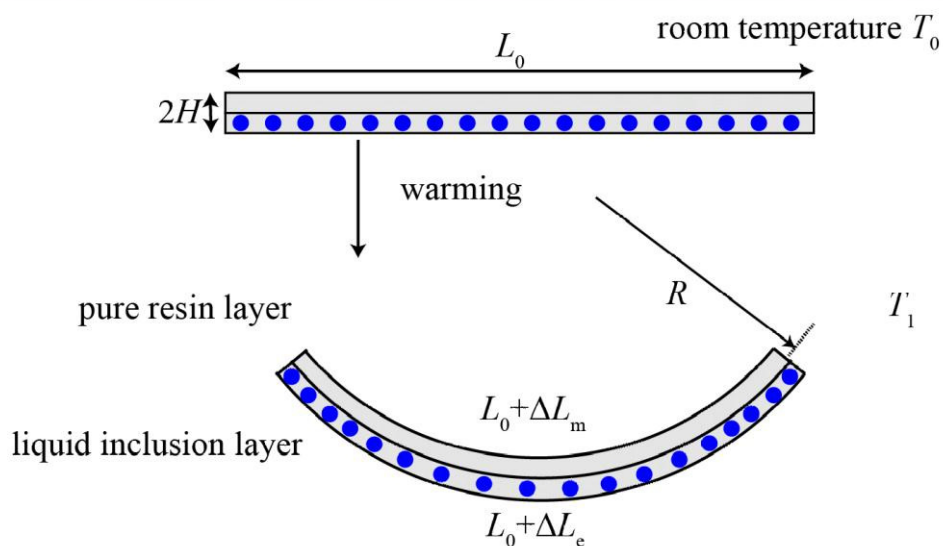

**Figure S7.** Thermal deflection of the two-layer beam in a temperature rise. The initial straight beam has a length  $L_0$  at the room temperature  $T_0$ . An increase in temperature to  $T_1$  induces a larger length increase  $\Delta L_e$  in the bottom layer than the length increase  $\Delta L_m$  in the top layer, and the beam becomes curved with a radius of curvature  $R$ .
